1 **Title:** High-resolution architecture of human epiphysis formation

2

3 **Authors:** SUN Heng<sup>1,2,\*</sup>, WEN Ya<sup>1,2,\*</sup>, WU Weiliang<sup>5,\*</sup>, QIN Tian<sup>1,2</sup>, AN Chengrui<sup>1,2</sup>, FAN  
4 Chunmei<sup>1,2</sup>, CHEN Yishan<sup>1,2</sup>, JI Junfeng<sup>6</sup>, CHEW Ting Gang<sup>2</sup>, CHEN Jiansong<sup>5,\*\*</sup>, OUYANG  
5 Hongwei<sup>1,2,3,4,\*\*</sup>

6

7 **Affiliation:**

8 1. Dr. Li Dak Sum & Yip Yio Chin Center for Stem Cells and Regenerative Medicine, and  
9 Department of Orthopedic Surgery of the Second Affiliated Hospital, Zhejiang University School of  
10 Medicine, Hangzhou, China.

11 2. Zhejiang University-University of Edinburgh Institute, Zhejiang University School of Medicine,  
12 and Key Laboratory of Tissue Engineering and Regenerative Medicine of Zhejiang Province,  
13 Zhejiang University School of Medicine, Hangzhou, China.

14 3. Department of Sports Medicine, Zhejiang University School of Medicine, Hangzhou, China.

15 4. China Orthopedic Regenerative Medicine Group (CORMed), Hangzhou, China.

16 5. Department of Orthopedic Surgery, The Children's Hospital, Zhejiang University School of  
17 Medicine, National Clinical Research Center for Child Health, Hangzhou, Zhejiang, China.

18 6. Center for Stem Cell and Regenerative Medicine, and Bone Marrow Transplantation Center of the  
19 First Affiliated Hospital, Zhejiang University School of Medicine, Hangzhou, China.

20

21 \* These authors contribute equally to this work.

22 \*\* Corresponding author: [hwoy@zju.edu.cn](mailto:hwoy@zju.edu.cn); [6508017@zju.edu.cn](mailto:6508017@zju.edu.cn)

23

24 **Summary**

25 **Human limb skeletal system consists of both bone and cartilage which originated from fetal**  
26 **cartilage. However, the roadmap of chondrocyte divergent differentiation to bone and articular**  
27 **cartilage has yet to be established. Epiphysis possesses articular cartilage, growth plate and the**  
28 **secondary ossification center (SOC), making it an ideal model to uncover the trajectory of**  
29 **chondrocyte divergent differentiation. Here, we mapped differentiation trajectory of human**  
30 **chondrocyte during postnatal finger epiphysis development by using single-cell RNA**

31 **sequencing. Our results uncovered that chondroprogenitors have two differentiation pathways**  
32 **to hypertrophic chondrocytes during ossification, and one pathway to articular chondrocytes**  
33 **for formation of cartilages. Interestingly, we found that, as an addition to the known typical**  
34 **endochondral ossification path from resting, proliferative to hypertrophic chondrocytes, there**  
35 **was a bypass by which chondroprogenitors differentiate into hypertrophic chondrocytes**  
36 **without proliferative stage. Furthermore, our results revealed two new chondrocyte**  
37 **subpopulations (bypass chondrocytes as it appeared in the ossification bypass, and *IDI*<sup>+</sup>**  
38 **chondroblasts in articular chondrocyte path) during postnatal epiphysis development in**  
39 **addition to six well-known subpopulations. Overall, our study provides a comprehensive**  
40 **roadmap of chondrocyte differentiation in human epiphysis thereby expanding the knowledge**  
41 **of bone and articular cartilage, which could be utilized to design biotherapeutics for bone and**  
42 **articular cartilage regeneration.**

43

#### 44 **Human chondrocyte identification**

45 To investigate the chondrocyte differentiation trajectory during human epiphysis development, the  
46 phalanges from polydactyl patients were used. The histological staining of the 2-year-old polydactyl  
47 phalange showed a typical long bone structure (Fig. S1A), similar with the human femur(1).

48 The bone and cartilage tissues from polydactyly samples were collected and digested for 4 hours  
49 before single-cell isolation, library preparation and sequencing (Fig. 1A). After quality control  
50 process, we obtained 27,461 single cells for data analysis (Fig. S1B). We clustered these cells using  
51 the well-established method Seurat(2, 3), and found 10 clusters identified as chondrocytes (*COL2A1*),  
52 fibroblasts (*COL1A2*), vascular cells (*PECAM1*), muscular cells (*ACTA2*), antigen presenting cells  
53 (*HLA-DRA*), osteoblasts (*BGLAP*), natural killer cells (*NKG7*), Schwann cells (*MPZ*), erythrocytes  
54 (*HBA1*), and megakaryocytes (*MMRNI*) (Fig. S1C and S1D). Among them, both clusters 0 and 5  
55 robustly expressed the chondrocyte marker *COL2A1*, and they were highly related with cartilage  
56 development (Fig S1E). Therefore, we selected these 14,434 single cells from clusters 0 and 5 for  
57 further analysis.

58 Using Seurat, the cartilage-related cells were clustered into eight clusters (Fig. 1B and C). With the  
59 highly expressed genes in each cluster, we were able to identify the well-known chondrocyte  
60 subpopulations, including chondroprogenitors (*FGF2*), resting chondrocytes (*FST*), proliferative

61 chondrocytes (*MATN3*), hypertrophic chondrocytes (*COL10A1*), fibrochondrocytes (*COL1A2*), and  
62 superficial chondrocytes (*PRG4*). Interestingly, we also discovered new transitional cells, like the  
63 *DKK1*<sup>+</sup> cluster, and *IDI*<sup>+</sup> cluster which would be discussed later (Fig. 1C and D).

64

### 65 **Endochondral ossification fate of human chondrocytes**

66 In an attempt to map the trajectory of chondrocyte differentiation, we performed the  
67 pseudo-temporal analysis by using Monocle3 (4–6). Our analysis results showed that chondrocyte  
68 differentiation started from chondroprogenitors (dark purple) and eventually adopted either articular  
69 or hypertrophic cell fate (yellow) by progressing through different paths on the pseudo-time axis (Fig.  
70 S2A).

71 We first looked into the endochondral ossification branch, in which chondroprogenitors  
72 differentiate into resting chondrocytes, proliferative chondrocytes and eventually hypertrophic  
73 chondrocytes in a step-wise manner (Fig. 2A and B). The chondroprogenitors highly expressed  
74 *FGF2* encoding the growth factor which is important for cell proliferation and tissue development.  
75 *FGF2* is expressed in human fetal cartilage and its expression is located at resting and proliferative  
76 zones, but not hypertrophic zone(7). *TM4SF1* and *GREM1*, the two mesenchymal stem cell  
77 markers(8, 9), were also highly expressed in this cluster, confirming the progenitor identity (Fig. 2C  
78 and S2B ). Immunostaining of the 2-year-old middle phalange proximal epiphysis showed that, in  
79 line with *FGF2*, the Transmembrane 4 L6 Family Member 1 (encoded by *TM4SF1*) was also  
80 abundantly expressed in resting and proliferative zones but decreased in hypertrophic zone (Fig. 2C).

81 Resting chondrocytes were marked by *PTH1H*, the gene that encodes parathyroid hormone-related  
82 protein (PTHrP), and *SFRP5*, which were both reported to be expressed in resting chondrocytes(10,  
83 11). Interestingly, we found that this chondrocyte subpopulation expressed another marker gene *FST*  
84 which encodes follistatin (Fig. 2D and S2C), a BMP antagonist. Immunostaining of the phalangeal  
85 epiphysis demonstrated that follistatin positive resting chondrocytes were located near the  
86 proliferative and hypertrophic zones (Fig. 2D). These results are consistent with the previously  
87 reported inhibition of BMP signaling in resting zone(12).

88 Proliferative chondrocytes and hypertrophic chondrocytes had the highest expression levels of the  
89 mature cartilage matrix genes *COL9A3*, *COL11A1* (13) as well as *MATN3* and *COL6A3* (Fig. 2E and  
90 S2D). The expression of the pre-hypertrophic marker *PTH1R* was elevated in the proliferative

91 chondrocytes too, consistent with previous studies that the chondrocytes in the bottom of the  
92 proliferative zone would become hypertrophic (Fig. S2E). The hypertrophic markers *COL10A1*,  
93 *SPP1* and osteogenic marker *IBSP* were all highly expressed in the hypertrophic chondrocytes,  
94 demonstrating the terminal chondrocyte differentiation. As expected, the immunostaining of the  
95 phalangeal epiphysis showed the positive signals of type X collagen right next to bone (Fig. 2F and  
96 S2F).

97 The four chondrocyte subpopulations exhibited the typical endochondral ossification trajectory  
98 from chondroprogenitors to hypertrophic chondrocytes in the growth plate, which was consistent  
99 with the conventional view (14). The gene expression trend along this trajectory also confirmed that  
100 the expressions of progenitor-related genes *FGF2* and *TM4SF1* were declined gradually with  
101 concomitant step-wise upregulation of the mature chondrocyte-related extracellular matrix genes  
102 *MATN3* and *COL11A1* (Fig. 2G). Therefore, our data successfully recapitulated the endochondral  
103 ossification trajectory.

104

#### 105 **Articular chondrocyte differentiation fate of human chondrocytes**

106 The articular chondrocyte differentiation trajectory was composed of chondroprogenitors, the  
107 newly discovered *IDI*<sup>+</sup> chondroblasts, fibrochondrocytes and superficial chondrocytes (Fig. 3A and  
108 B).

109 *IDI* and *ID3*, the two markers of the chondroblast subpopulation (Fig. 3C and S3A), were reported  
110 to be expressed in less differentiated chondrocytes, and play a key role in the regulation of cell-cycle  
111 progression and cell differentiation in chondrocyte and other cells (15–17). *IDI* was also  
112 up-regulated in mesenchymal stem cells forming cartilage (18). The immunostaining of the  
113 phalangeal epiphysis showed a diffused distribution of ID1 in the periarticular area, indicating that  
114 these cells may give rise to the articular cartilage (Fig. 3C and S3A). As this subpopulation was  
115 located between chondroprogenitors and the fully differentiated chondrocytes, we regarded this  
116 subpopulation as chondroblasts (19).

117 *COL1A1/A2* marked the fibrochondrocytes (Fig. 3D and S3B). Since there are soft tissues  
118 including perichondrium, synovium and tendon that connect to the cartilage, it is not surprising to  
119 find the chondrocytes with soft connective tissue matrix in the transition section as shown by the  
120 immunostaining results. In fact, *STC1* and *COL14A1* were also found to be highly expressed in

121 fibrochondrocytes (Fig. 3D and S3C). Given the known expressions of *STC1* and *COL14A1* in  
122 human synovium and tendon, respectively, (20, 21) these data suggested that this subpopulation  
123 formed the cartilage that connected adjacent tissues.

124 The superficial chondrocytes were labeled by *PRG4*, the well-known marker for chondrocytes in  
125 the superficial layer. *Prg4*<sup>+</sup> cells were also thought to possess progenitor or regeneration  
126 potential(22–24). Consistently, immunostaining showed that the expression of lubricin encoded by  
127 *PRG4* was also located at the superficial layer (Fig. 3E and S3D), and superficial chondrocyte  
128 subpopulation had higher *FGF2* and *GREM1* levels compared with the adjacent chondroblasts and  
129 fibrochondrocytes (Fig. 2C and S2B). Moreover, *OGN*, the gene that encodes osteoglycin, was  
130 highly expressed in the superficial chondrocytes as well, which is in line with a previous report(25)  
131 (Fig. 3E).

132 Consistent with the endochondral ossification trajectory, the expression levels of the  
133 progenitor-related genes *FGF2* and *TM4SF1* decreased progressively, while the extracellular  
134 matrix-related genes *COL3A1* and *COL14A1* were increased (Fig. 3F).

135 Taken together, these data demonstrated the articular chondrocyte differentiation trajectory,  
136 improved the understanding of the articular cartilage development in the epiphysis.

137

### 138 **The bypass of ossification for human chondrocyte differentiation**

139 Intriguingly, in the pseudotime trajectory we found a cell type that bypasses the conventional  
140 step-wise differentiation of human chondrocytes. It appears that the chondroprogenitors  
141 differentiated to hypertrophic chondrocytes directly after transiting into a specific chondrocyte  
142 subpopulation. Therefore, we named this subpopulation as bypass chondrocytes (Fig. 4A and B).  
143 Both *DKK1* and *WIF1* encoding antagonists of WNT signaling pathway were highly expressed in  
144 this subpopulation together with *SMPD3* (Fig. 4C and S4A). *SMPD3* is expressed in  
145 pre-hypertrophic chondrocytes, marking the hypertrophic fate of the cells(26). *Smpd3* deficiency  
146 caused ossification retardation and SOC absence(27), pointing to the significant role of *SMPD3* in  
147 the epiphysis development. Same as the previous trajectory, the chondrocytes lost the  
148 chondroprogenitor identity and become hypertrophic gradually, as *FGF2* and *TM4SF1* expression  
149 were down-regulated and *PTH1R* and *SMPD3* were up-regulated (Fig. 4D).

150 Since both proliferative chondrocytes and bypass chondrocytes are able to differentiate into

151 hypertrophic chondrocytes, these two subpopulations were further compared in details. The  
152 proliferative chondrocytes expressed higher levels of extracellular matrix genes such as *MATN3* and  
153 *COL6A3*, suggestive of their more mature characteristics. By contrast, the bypass chondrocytes  
154 exhibited higher *FGF2* and *GREM1* expressions therefore more resembling chondroprogenitors. The  
155 differential expression levels of *DKK1* and *WIF1* further confirmed that these two subpopulations  
156 were distinct from each other (Fig. 4E). However, the two subpopulations both expressed  
157 pre-hypertrophic chondrocyte markers, including *PTH1R*, *SMPD3* and *IHH*, demonstrating their  
158 hypertrophic destination (Fig. 4F). Interestingly, the immunostaining of the phalangeal epiphysis  
159 showed the presence of Neutral sphingomyelinase 2 (NSMase-2, product of the *SMPD3* gene)  
160 marked bypass chondrocytes in the SOC, where the type  $\alpha$  collagen (COL6) level was low,  
161 indicating that the typical endochondral ossification trajectory and the bypass may conduct  
162 chondrocyte hypertrophy in different ossification centers (Fig. 4G and S4B). In fact, distinctions  
163 were found between primary ossification center (POC) and SOC, including the timing, the location  
164 and the direction through which ossification proceeds(28). The chondroprogenitors and stem cell-like  
165 resting chondrocytes were located next to the secondary ossification center in mice, with no obvious  
166 proliferative zone in the middle(29), showing the different cell arrangement SOC from growth plate.  
167 Thus, the bypass indicated a direct ossification path in the SOC, which is distinguishable from the  
168 typical endochondral ossification in the growth plate, and explained why the typical proliferative  
169 zone can hardly be seen in the secondary ossification center.

170 The bypass chondrocytes were then further divided into two clusters (Fig. 4H). The left cluster  
171 (subcluster 1) which was close to the hypertrophic chondrocytes had higher expression levels of  
172 *SMPD3*, *RUNX2*, *MEF2C* and *PTH1R*, demonstrating the hypertrophic chondrocyte differentiation  
173 process, whereas the right cluster (subcluster 0) was enriched with *WIF1* and *CLU*, which were  
174 reported to regulate chondrocyte proliferation in osteoarthritis(30, 31).

175 Taken together, these evidences demonstrated the direct ossification path that the  
176 chondroprogenitors directly differentiated to the hypertrophic chondrocytes in SOC, which could be  
177 quite different from canonical endochondral ossification process in growth plate.

178

179 In summary, we found that chondroprogenitors have two differentiation pathways to hypertrophic  
180 chondrocytes and one pathway to articular chondrocytes. Interestingly, as an alternative to the typical

181 4-stage endochondral ossification pathway, there was a direct ossification path by which  
182 chondroprogenitors could straightly differentiate into hypertrophic chondrocytes. Furthermore, our  
183 results revealed two new chondrocyte subpopulations (bypass chondrocytes in ossification path and  
184 *IDI*<sup>+</sup> chondroblasts in articular chondrocyte path) during postnatal epiphysis development in addition  
185 to six well-known subpopulations (chondroprogenitors, resting chondrocytes, proliferative  
186 chondrocytes, and hypertrophic chondrocytes in the endochondral ossification path;  
187 fibrochondrocytes, and superficial chondrocytes in the articular chondrocyte differentiation path).  
188 These results mapped a comprehensive developmental trajectory of chondrocyte differentiation in  
189 human epiphysis (Fig. 5), thereby expanding the knowledge of bone and articular cartilage, which  
190 could be utilized to design biotherapeutics for bone and articular cartilage regeneration.

191

#### 192 **Data Availability**

193 The sequencing raw data would be available before publication.

194

#### 195 **Code Availability**

196 The packages used for data analysis were stated in methods section. The full code for data analysis  
197 would be available before publication.

198

#### 199 **References:**

- 200 1. V. A. Funari, A. Day, D. Krakow, Z. A. Cohn, Z. Chen, S. F. Nelson, D. H. Cohn,  
201 Cartilage-selective genes identified in genome-scale analysis of non-cartilage and cartilage gene  
202 expression. *BMC Genomics*. **8**, 165 (2007).
- 203 2. A. Butler, P. Hoffman, P. Smibert, E. Papalexi, R. Satija, Integrating single-cell transcriptomic  
204 data across different conditions, technologies, and species. *Nat. Biotechnol.* **36**, 411–420  
205 (2018).
- 206 3. T. Stuart, A. Butler, P. Hoffman, C. Hafemeister, E. Papalexi, W. M. Mauck, Y. Hao, M.  
207 Stoeckius, P. Smibert, R. Satija, Comprehensive Integration of Single-Cell Data. *Cell*. **177**,  
208 1888-1902.e21 (2019).
- 209 4. J. Cao, M. Spielmann, X. Qiu, X. Huang, D. M. Ibrahim, A. J. Hill, F. Zhang, S. Mundlos, L.  
210 Christiansen, F. J. Steemers, C. Trapnell, J. Shendure, The single-cell transcriptional landscape  
211 of mammalian organogenesis. *Nature*. **566**, 496–502 (2019).
- 212 5. X. Qiu, Q. Mao, Y. Tang, L. Wang, R. Chawla, H. A. Pliner, C. Trapnell, Reversed graph



- 213 embedding resolves complex single-cell trajectories. *Nat. Methods*. **14**, 979–982 (2017).
- 214 6. C. Trapnell, D. Cacchiarelli, J. Grimsby, P. Pokharel, S. Li, M. Morse, N. J. Lennon, K. J. Livak,  
215 T. S. Mikkelsen, J. L. Rinn, The dynamics and regulators of cell fate decisions are revealed by  
216 pseudotemporal ordering of single cells. *Nat. Biotechnol.* **32**, 381–386 (2014).
- 217 7. P. Krejci, D. Krakow, P. B. Mekikian, W. R. Wilcox, Fibroblast Growth Factors 1, 2, 17, and 19  
218 Are the Predominant FGF Ligands Expressed in Human Fetal Growth Plate Cartilage. *Pediatr.*  
219 *Res.* **61**, 267–272 (2007).
- 220 8. S. Bae, S. H. Shim, C. W. Park, H. K. Son, H. Ju Lee, J. Y. Son, C. Jeon, H. Kim, Combined  
221 Omics Analysis Identifies Transmembrane 4 L6 Family Member 1 as a Surface Protein Marker  
222 Specific to Human Mesenchymal Stem Cells. *Stem Cells Dev.* **20**, 197–203 (2010).
- 223 9. D. L. Worthley, M. Churchill, J. T. Compton, Y. Taylor, M. Rao, Y. Si, D. Levin, M. G. Schwartz,  
224 A. Uygur, Y. Hayakawa, S. Gross, B. W. Renz, W. Setlik, A. N. Martinez, X. Chen, S. Nizami,  
225 H. G. Lee, H. P. Kang, J.-M. Caldwell, S. Asfaha, C. B. Westphalen, T. Graham, G. Jin, K.  
226 Nagar, H. Wang, M. A. Kheirbek, A. Kolhe, J. Carpenter, M. Glaire, A. Nair, S. Renders, N.  
227 Manieri, S. Muthupalani, J. G. Fox, M. Reichert, A. S. Giraud, R. F. Schwabe, J.-P. Pradere, K.  
228 Walton, A. Prakash, D. Gumucio, A. K. Rustgi, T. S. Stappenbeck, R. A. Friedman, M. D.  
229 Gershon, P. Sims, T. Grikscheit, F. Y. Lee, G. Karsenty, S. Mukherjee, T. C. Wang, Gremlin 1  
230 Identifies a Skeletal Stem Cell with Bone, Cartilage, and Reticular Stromal Potential. *Cell*. **160**,  
231 269–284 (2015).
- 232 10. K. Mizuhashi, W. Ono, Y. Matsushita, N. Sakagami, A. Takahashi, T. L. Saunders, T. Nagasawa,  
233 H. M. Kronenberg, N. Ono, Resting zone of the growth plate houses a unique class of skeletal  
234 stem cells. *Nature*. **563**, 254–258 (2018).
- 235 11. J. C. K. Lui, A. C. Andrade, P. Forcinito, A. Hegde, W. Chen, J. Baron, O. Nilsson, Spatial and  
236 temporal regulation of gene expression in the mammalian growth plate. *Bone*. **46**, 1380–1390  
237 (2010).
- 238 12. P. Garrison, S. Yue, J. Hanson, J. Baron, J. C. Lui, Spatial regulation of bone morphogenetic  
239 proteins (BMPs) in postnatal articular and growth plate cartilage. *PLoS ONE*. **12** (2017),  
240 doi:10.1371/journal.pone.0176752.
- 241 13. S. I. Vornehm, J. Dudhia, K. von der Mark, T. Aigner, Expression of collagen types IX and XI  
242 and other major cartilage matrix components by human fetal chondrocytes in vivo. *Matrix Biol.*  
243 **15**, 91–98 (1996).
- 244 14. S. A. Hallett, W. Ono, N. Ono, Growth Plate Chondrocytes: Skeletal Development, Growth and  
245 Beyond. *Int. J. Mol. Sci.* **20**, 6009 (2019).
- 246 15. J. Asp, M. Thornemo, S. Inerot, A. Lindahl, The helix-loop-helix transcription factors Id1 and  
247 Id3 have a functional role in control of cell division in human normal and neoplastic  
248 chondrocytes. *FEBS Lett.* **438**, 85–90 (1998).



- 249 16. M. Thornemo, E. S. Jansson, A. Lindahl, Expression of the ID1 and ID3 Genes during  
250 Chondrocyte Differentiation. *Ann. N. Y. Acad. Sci.* **785**, 337–339 (1996).
- 251 17. C. Roschger, C. Cabrele, The Id-protein family in developmental and cancer-associated  
252 pathways. *Cell Commun. Signal.* **15**, 7 (2017).
- 253 18. C. Karlsson, C. Brantsing, T. Svensson, H. Brisby, J. Asp, T. Tallheden, A. Lindahl,  
254 Differentiation of human mesenchymal stem cells and articular chondrocytes: Analysis of  
255 chondrogenic potential and expression pattern of differentiation-related transcription factors. *J.*  
256 *Orthop. Res.* **25**, 152–163 (2007).
- 257 19. V. Lefebvre, P. Smits, Transcriptional control of chondrocyte fate and differentiation. *Birth*  
258 *Defects Res. Part C Embryo Today Rev.* **75**, 200–212 (2005).
- 259 20. Y. Wu, Z. Li, W. Jia, M. Li, M. Tang, Upregulation of stanniocalcin-1 inhibits the development  
260 of osteoarthritis by inhibiting survival and inflammation of fibroblast-like synovial cells. *J. Cell.*  
261 *Biochem.* **120**, 9768–9780 (2019).
- 262 21. H. L. Ansorge, X. Meng, G. Zhang, G. Veit, M. Sun, J. F. Klement, D. P. Beason, L. J.  
263 Soslowsky, M. Koch, D. E. Birk, Type XIV Collagen Regulates Fibrillogenesis PREMATURE  
264 COLLAGEN FIBRIL GROWTH AND TISSUE DYSFUNCTION IN NULL MICE. *J. Biol.*  
265 *Chem.* **284**, 8427–8438 (2009).
- 266 22. R. S. Decker, H.-B. Um, N. A. Dymont, N. Cottingham, Y. Usami, M. Enomoto-Iwamoto, M. S.  
267 Kronenberg, P. Maye, D. W. Rowe, E. Koyama, M. Pacifici, Cell origin, volume and  
268 arrangement are drivers of articular cartilage formation, morphogenesis and response to injury  
269 in mouse limbs. *Dev. Biol.* **426**, 56–68 (2017).
- 270 23. E. Kozhemyakina, M. Zhang, A. Ionescu, U. M. Ayturk, N. Ono, A. Kobayashi, H. Kronenberg,  
271 M. L. Warman, A. B. Lassar, Identification of a Prg4-Expressing Articular Cartilage Progenitor  
272 Cell Population in Mice. *Arthritis Rheumatol.* **67**, 1261–1273 (2015).
- 273 24. L. Li, P. T. Newton, T. Boudierlique, M. Sejnohova, T. Zikmund, E. Kozhemyakina, M. Xie, J.  
274 Krivanek, J. Kaiser, H. Qian, V. Dyachuk, A. B. Lassar, M. L. Warman, B. Barenus, I.  
275 Adameyko, A. S. Chagin, Superficial cells are self-renewing chondrocyte progenitors, which  
276 form the articular cartilage in juvenile mice. *FASEB J.* **31**, 1067–1084 (2017).
- 277 25. S. P. Grogan, S. F. Duffy, C. Pauli, J. A. Koziol, A. I. Su, D. D. D’Lima, M. K. Lotz,  
278 Zone-specific gene expression patterns in articular cartilage. *Arthritis Rheum.* **65**, 418–428  
279 (2013).
- 280 26. J. Li, G. Manickam, S. Ray, C. Oh, H. Yasuda, P. Moffatt, M. Murshed, Smpd3 Expression in  
281 both Chondrocytes and Osteoblasts Is Required for Normal Endochondral Bone Development.  
282 *Mol. Cell. Biol.* **36**, 2282–2299 (2016).
- 283 27. W. Stoffel, B. Jenke, B. Blöck, M. Zumbansen, J. Koebke, Neutral sphingomyelinase 2 (smpd3)  
284 in the control of postnatal growth and development. *Proc. Natl. Acad. Sci.* **102**, 4554–4559

285 (2005).

286 28. W. Xing, S. Cheng, J. Wergedal, S. Mohan, Epiphyseal Chondrocyte Secondary Ossification  
287 Centers Require Thyroid Hormone Activation of Indian Hedgehog and Osterix Signaling. *J.*  
288 *Bone Miner. Res.* **29**, 2262–2275 (2014).

289 29. P. T. Newton, L. Li, B. Zhou, C. Schweingruber, M. Hovorakova, M. Xie, X. Sun, L. Sandhow,  
290 A. V. Artemov, E. Ivashkin, S. Suter, V. Dyachuk, M. El Shahawy, A. Gritli-Linde, T.  
291 Boudierlique, J. Petersen, A. Mollbrink, J. Lundeberg, G. Enikolopov, H. Qian, K. Fried, M.  
292 Kasper, E. Hedlund, I. Adameyko, L. Sävendahl, A. S. Chagin, A radical switch in clonality  
293 reveals a stem cell niche in the epiphyseal growth plate. *Nature.* **567**, 234–238 (2019).

294 30. C. Tarquini, S. Pucci, M. G. Scioli, E. Doldo, S. Agostinelli, F. D’Amico, A. Bielli, A. Ferlosio,  
295 E. Caredda, U. Tarantino, A. Orlandi, Clusterin exerts a cytoprotective and antioxidant effect in  
296 human osteoarthritic cartilage. *Aging.* **12**, 10129–10146 (2020).

297 31. Z. Zhu, X. Bai, H. Wang, X. Li, G. Sun, P. Zhang, A study on the mechanism of Wnt inhibitory  
298 factor 1 in osteoarthritis. *Arch. Med. Sci.* **16**, 898–906 (2020).

299

300 **Figures:**

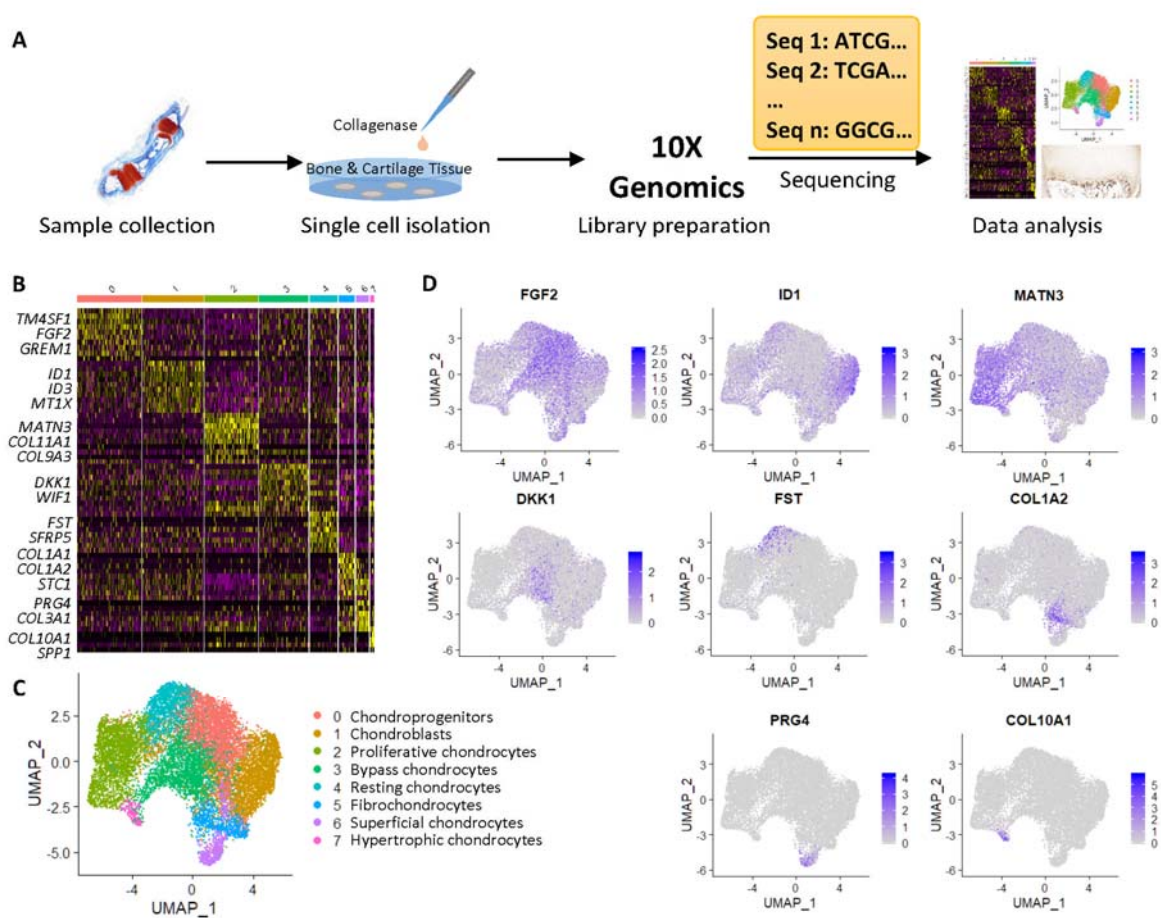

301

302 **Figure 1:** Chondrocyte heterogeneity. **(A)** Workflow of the single-cell RNA sequencing analysis. **(B)**

303 Heatmap of the differentially expressed genes for each cluster. **(C)** Cell clusters visualized by UMAP.

304 **(D)** Expression levels of the representative genes for each cluster.

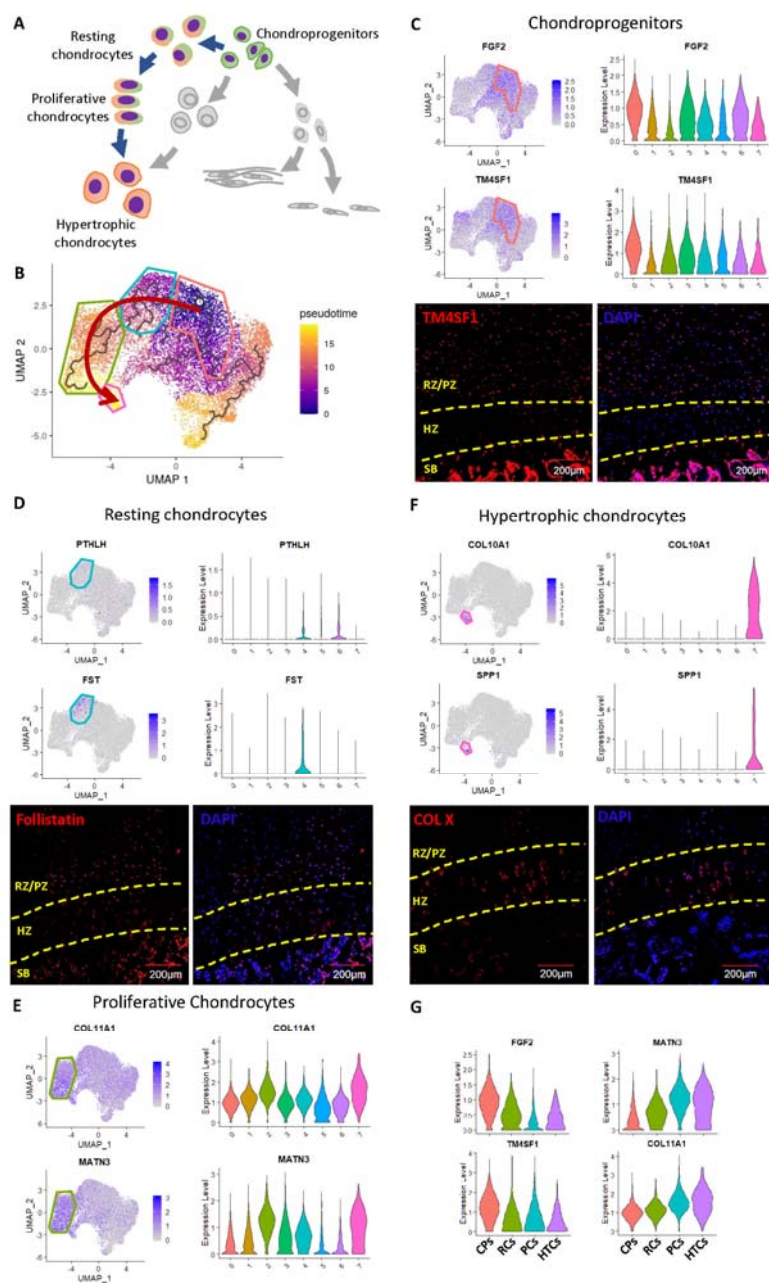

305

306 **Figure 2.** Identification of the typical endochondral ossification trajectory. (A) Schematic of the  
 307 typical endochondral ossification trajectory. (B) Pseudotime analysis visualized by UMAP. Red  
 308 arrow shows the typical endochondral ossification trajectory. (C-F) Gene expression levels and  
 309 immunostaining of the chondroprogenitor (C), resting chondrocyte (D), proliferative chondrocyte (E),  
 310 and hypertrophic chondrocyte (F) markers. RZ/PZ, resting zone/proliferative zone; HZ, hypertrophic  
 311 zone; SB, subchondral bone. (G) Gene expression trends in the typical endochondral ossification  
 312 trajectory. CPs, chondroprogenitors; RCs, resting chondrocytes; PCs, proliferative chondrocytes;  
 313 HTCs, hypertrophic chondrocytes.

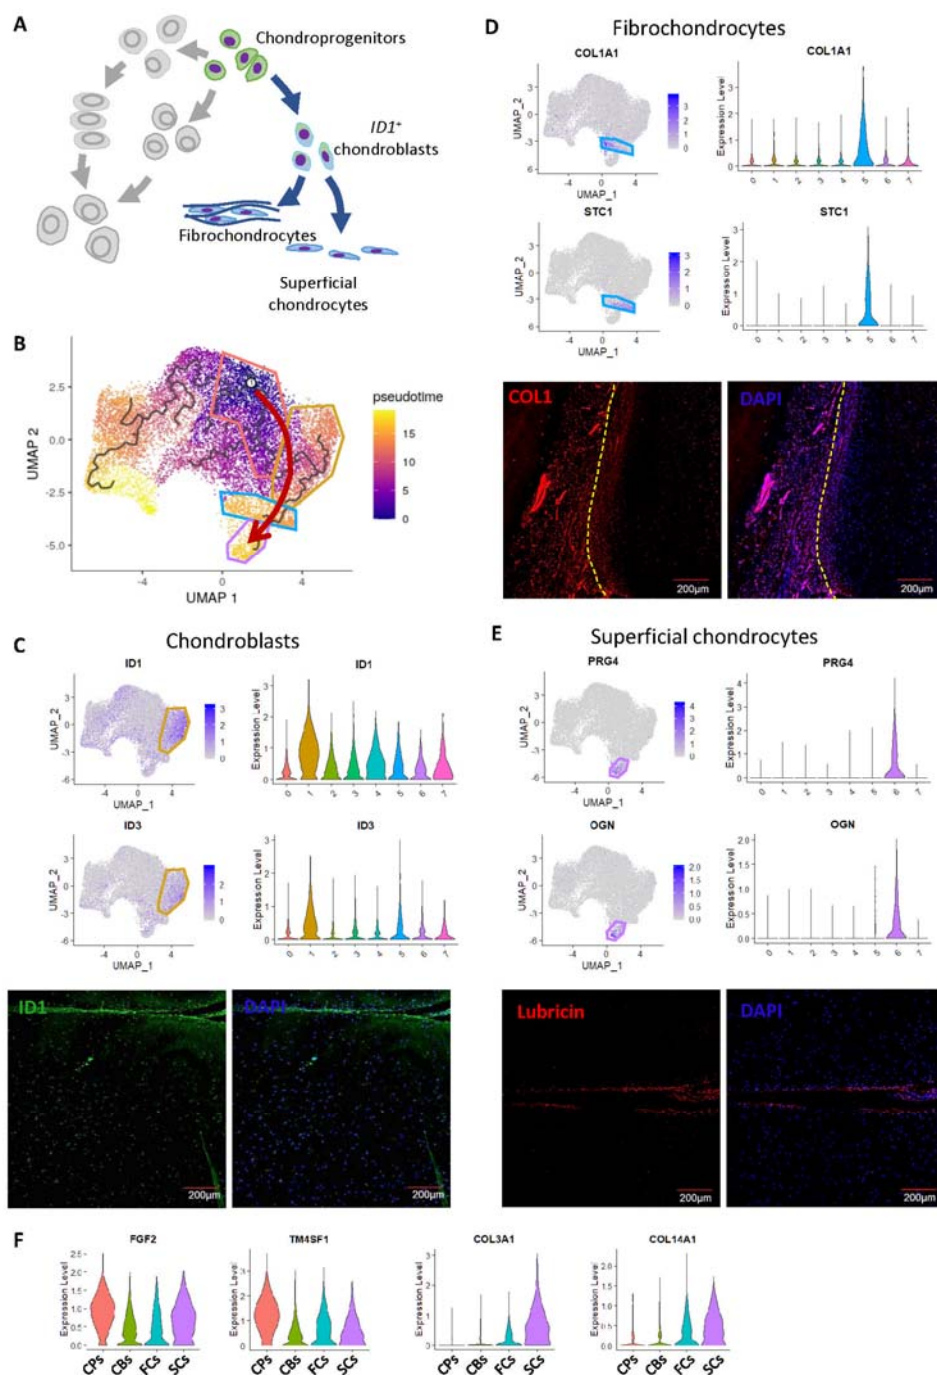

314

315 **Figure 3.** Identification of the articular chondrocyte differentiation trajectory. (A) Schematic of the  
 316 articular chondrocyte differentiation trajectory. (B) Pseudotime analysis visualized by UMAP. Red  
 317 arrow shows the articular chondrocyte differentiation trajectory. (C-E) Gene expression levels and  
 318 immunostaining of the chondroblast, fibrochondrocyte, and superficial chondrocyte markers. (F)  
 319 Gene expression trends in the articular chondrocyte differentiation trajectory. CPs,  
 320 chondroprogenitors; CBs, chondroblasts; FCs, fibrochondrocytes; SCs, superficial chondrocytes.



321

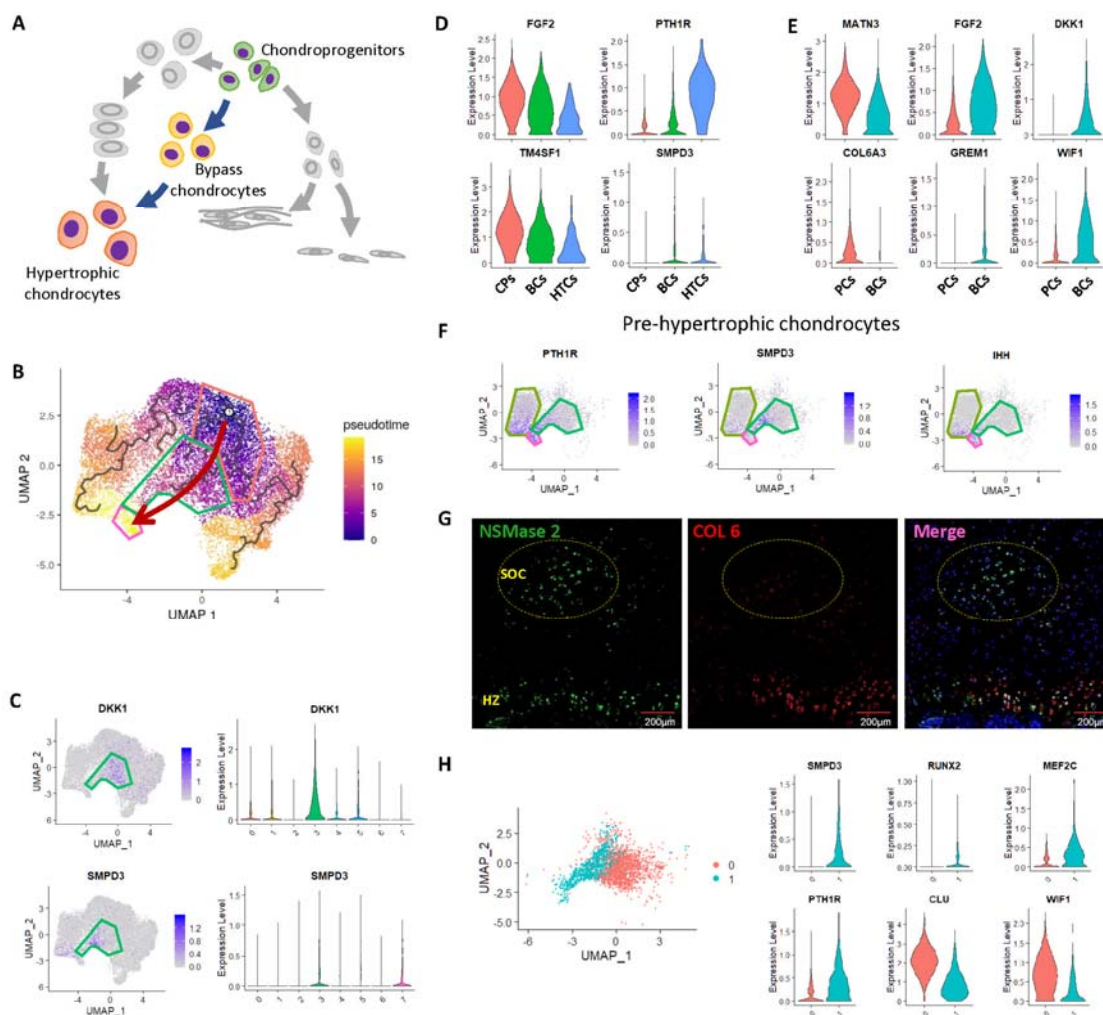

322

323 **Figure 4.** Identification of the chondrocyte differentiation bypass. **(A)** Schematic of the chondrocyte  
 324 differentiation bypass. **(B)** Pseudotime analysis visualized by UMAP. Red arrow shows the bypass.  
 325 **(C)** Gene expression levels of the bypass chondrocyte markers. **(D)** Gene expression trends in the  
 326 bypass. CPs, chondroprogenitors; BCs, bypass chondrocytes; HTCs, hypertrophic chondrocytes. **(E)**  
 327 Representative differentially expressed genes between proliferative chondrocytes and bypass  
 328 chondrocytes. **(F)** Gene expression levels of the pre-hypertrophic chondrocyte markers. **(G)**  
 329 Immunostaining of the proliferative chondrocyte marker and the bypass chondrocyte marker. **(H)**  
 330 Subclusters of the bypass chondrocytes.

331

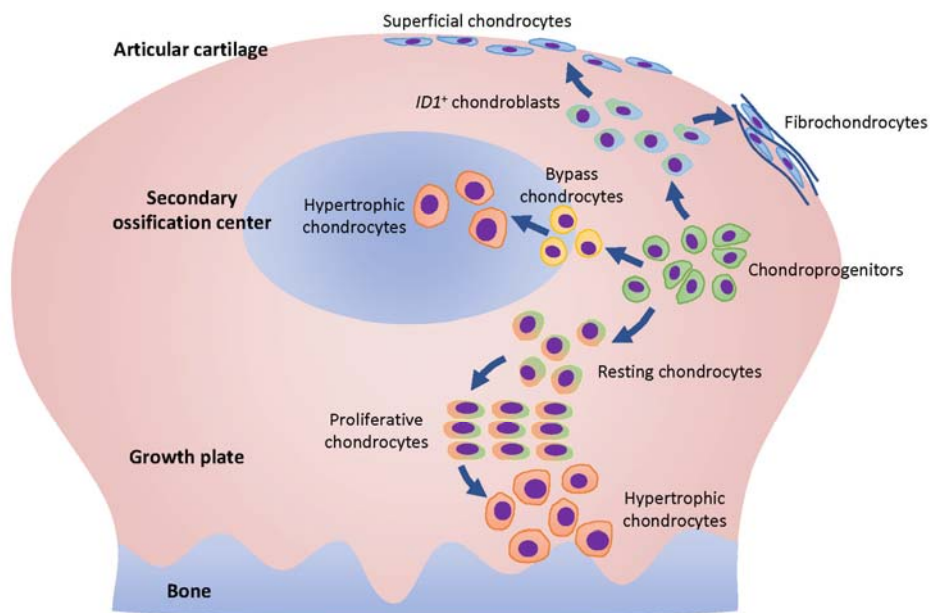

332

333 **Figure 5.** Schematic of the chondrocyte differentiation trajectories in human epiphysis.

334



## 335 **Methods and materials**

### 336 1. Human sample collection

337 We collected human polydactyl fingers from 4 babies (from 9 months to 8 years old). The  
338 procedure was approved by Children's Hospital of Zhejiang University School of Medicine ethics  
339 committee (No. 2020-IRB-077). The bone and cartilage tissues were isolated and digested in 2%  
340 collagenases for 4 hours. The single cells were collected for 10× Genomics library preparation.

### 341 2. Preparation of single cell suspension

342 Cell number and viability were analyzed using hemocytometer and trypan blue. This method  
343 produces a single cell suspension with a concentration of 1000/μL and an activity exceeding 80%.

### 344 3. Single cell RNA sequencing: barcoding and cDNA synthesis

345 The single cell suspension was loaded onto a well on a 10x Chromium Single Cell instrument (10x  
346 Genomics). Barcoding and cDNA synthesis were performed according to the manufacturer's  
347 instructions. Briefly, the 10x™ GemCode™ Technology partitions thousands of cells into  
348 nanoliter-scale Gel Beads-In-EMulsions (GEMs), where all the cDNA generated from an individual  
349 cell share a common 10x Barcode. Unique Molecular Identifier (UMI) was also added to identify the  
350 PCR duplicates. The GEMs were incubated with reverse transcription reagents to produce full length  
351 cDNA, which was then amplified via PCR to generate sufficient mass for library construction. The  
352 Qubit Fluorometer, Qubit dsDNA HS Assay Kit (Thermo Fisher Scientific, Cat# Q32854) and  
353 Agilent 2100 Bioanalyzer were used for QC and Qualitative analysis.

### 354 4. Single cell RNA sequencing: library construction and quality control

355 The cDNA libraries were constructed using the 10x Chromium™ Single cell 3' Library Kit  
356 according to the manufacturer's original protocol. Briefly, after the cDNA amplification, enzymatic  
357 fragmentation and size selection were performed using SPRI select reagent (Beckman Coulter, Cat#  
358 B23317) to optimize the cDNA size. P5, P7, a sample index and TruSeq read 2 (R2) primer sequence  
359 were added via End Repair, A-tailing, Adaptor Ligation, and PCR. The final single cell 3' gene  
360 expression library contains a standard Illumina paired-end constructs (P5 and P7), Read 1 (R1)  
361 primer sequence, 16 bp 10x barcode, 12 bp UMI, cDNA fragments, R2 primer sequence and sample  
362 index. For post library construction QC and quantification, Qubit Fluorometer, Qubit dsDNA HS  
363 Assay Kit and Agilent 2100 Bioanalyzer were used.

### 364 5. Single cell RNA sequencing and generation of data matrix

365 Libraries were sequenced on an Illumina HiSeq X™ using HiSeq X™ Five Reagent Kit  
366 v2(Illumina, Cat# FC-502-2021).

## 367 6. Data processing

368 The .bcl files were called bases with Cellranger. The parameters were default. All the sequences in  
369 FASTQ were aligned to hg38.p5 reference and counted with Cellranger. The counts files were  
370 preprocessed with MATLAB. In detail, all fragments from non-protein coding genes were removed.  
371 All ribosome protein genes were removed because they have heavy multiple colinear effects  
372 interfering recognition of cell type with potential biological meaning. The counts data were  
373 normalized with CPM (counts per million), and all the cells with feature number lower than 1000 or  
374 higher than 7000 were removed. Cells with transcripts from mitochondrial genome occupying more  
375 than 50% in their library were removed. The genes whose CPM larger than two in at least 2 cells  
376 were selected for further analysis. The data were analyzed in R studio software (ver. 3.6.2), with  
377 Seurat package (ver. 3.1.2) from Satija Lab (<https://satijalab.org/seurat/>) and Monocle 3 package (ver.  
378 0.2.2) from Cole Trapnell Lab (<https://cole-trapnell-lab.github.io/monocle3/>), following the standard  
379 protocol. In brief, the Seurat object was generated from digital gene expression matrices. Fourteen  
380 principal components were used in cell cluster with the resolution parameter set at 0.4. Then we  
381 performed cell cluster and UMAP Marker genes of each cell cluster were outputted to define cell  
382 clusters. The dimension reduction result conducted by Seurat was then used for pseudotime analysis  
383 by Monocle 3.

## 384 7. Tissue fixation and histology processing

385 Tissues for histology and immunostaining were fixed in 4% (w/v) paraformaldehyde for 24 h  
386 before decalcification in 10% (w/v) ethylene diamine tetraacetic acid (EDTA) solution. Subsequently,  
387 samples were embedded in paraffin and sliced (7 μm) for further safranin O/fast green staining or  
388 immunostaining.

## 389 8. Safranin O/fast green staining

390 The sections were deparaffinized and stained by hematoxylin for 20 min, followed by 8 min fast  
391 green staining, 1 s acetic acid washing, and 8 min safranin O staining subsequently. Then the slides  
392 were mounted by resinene and scanned with the digital scanner (3DHISTECH, Hungary)

## 393 9. Immunostaining

394 Paraffin sections for immunohistochemistry were treated with 0.25% trypsin (Gibco, USA), 3%

395 (v/v) hydrogen peroxide in methanol, 1% (w/v) BSA, primary antibodies (TM4SF1, ab113504;  
396 follistatin, ab203131; COLX, ab58632; ID1, ab168256; COL1, AF7001; lubricin, ab28484;  
397 NSMase2, ab68735; COL6, ab6588) and secondary antibodies ( A11008 and A21202, Invitrogen,  
398 USA) subsequently. The DAB substrate system (ZSGB-bio, China) was used for color development.  
399 Hematoxylin staining was utilized to reveal the cell nuclei. Then the slides were mounted with  
400 resinene and scanned by the digital slide scanner (3DHISTECH Panoramic MIDI, Hungary). For  
401 immunofluorescence, the Alexa Fluor 488 or 546 conjugated secondary antibodies (Thermo Fisher  
402 Scientific, USA) were used, as well as DAPI (Beyotime, China) to reveal the cell nuclei. The images  
403 were acquired using a confocal microscope (Olympus, Japan).

404

#### 405 **Acknowledgements:**

406 We give our special thanks to the patients who provided the precious samples for this research, as  
407 well as the families and doctors supporting them. We also would like to thank for the technical  
408 support by the Core Facilities, Zhejiang University School of Medicine.

409

#### 410 **Funding Sources:**

411 This work was supported by the National Key R&D Program of China (2017YFA0104900) and  
412 Natural Science Foundation of China (31830029).

413

#### 414 **Conflicts of Interest:**

415 We declare that we have no conflicts of interest.

416

#### 417 **Author Contributions:**

418 H.S, Y.W and H.O designed the research; W.W and J.C collected the clinical samples; H.S, Y.W,  
419 T.Q, and Y.C performed the cellular and molecular experiments; H.S, T.Q, and C.A analyzed the data;  
420 H.S, T.Q, C.A, J.J, C.TG and H.O wrote the manuscript.
